# Supplementary material for: Seasonal drought shapes the relationship between stem CO2 efflux and belowground respiration in an even-age rubber plantation on Hainan Island, China
Source: Frontiers journal article supplement (doi:10.3389/fpls.2025.1552859), 2025-07-16
Supplement: Table_1.xlsx [file Table_1.xlsx]

## Sheet: Sheet1
Table 1. Characteristics of nine sampled rubber trees for CO2 efflux and sap flow measurements
Treatment	Tree	Height（m）	Diameter of stem at 1.5 m （cm）
Tapping	TJ301	16.9	20.5
Tapping	TJ302	16.6	19.7
Tapping	TJ303	18.5	22.3
Non-tapping	UT201	17.1	22.6
Non-tapping	UT202	18.2	24.8
Non-tapping	UT203	17.8	21.6
Sap flow	I101	17.6	22.6
Sap flow	I102	18.4	24.8
Sap flow	I103	16.7	23.6
Note: TJ, UT and I represent tree numbers
